# Supplementary material
Source: HighWire-hosted journal article supplement (http://www.ajnr.org/highwire/filestream/66836/field_highwire_adjunct_files/0/18-01101.pdf)
Supplement: 18-01101.pdf [file 18-01101.pdf]

**On-line Table 1: Main features of endoluminal flow-diverting devices**

| Device             | Diameter (mm)                    | Length (mm)                              | Coverage (%)                               | Porosity (%)                                      | Pore Size ( $\mu\text{m}$ )                               | Deployment                                                | Resheathable                                                    | Comments                                                                                                                                                  |
|--------------------|----------------------------------|------------------------------------------|--------------------------------------------|---------------------------------------------------|-----------------------------------------------------------|-----------------------------------------------------------|-----------------------------------------------------------------|-----------------------------------------------------------------------------------------------------------------------------------------------------------|
| PED                | 2.5–5.0 <sup>a</sup>             | 10–35                                    | Variable <sup>b</sup>                      | Variable <sup>b</sup>                             | Not reported                                              | Pusher wire with unsheathing and redeployed up to 2 times | No                                                              | –                                                                                                                                                         |
| Pipeline Flex      | 2.5–5.0 <sup>a</sup>             | 10–35                                    | 30–35                                      | 65–70                                             | Not reported                                              | Can be repositioned and redeployed up to 2 times          | Yes, fully                                                      | Device identical to parent product but with enhanced delivery system                                                                                      |
| Silk               | 2.0–5.0                          | 15–40                                    | 40–55                                      | 45–60                                             | 110–250                                                   | Not reported                                              | Not reported                                                    | –                                                                                                                                                         |
| Silk + FRED        | Not reported<br>3.5–5.5          | 15–40 <sup>c</sup><br>10–38 <sup>d</sup> | Not reported<br>22–44                      | Not reported<br>Inner layer low, outer layer high | Not reported<br>Not reported                              | Not reported<br>Push-pull                                 | Yes, up to 90%<br>Yes, up to 80%                                | Available in tapered sizes; enhanced visibility vs Silk Full-length radiopacity; can be simultaneously deployed or partially retrieved by single operator |
| p64                | 2.5–5.0                          | 12–36                                    | Not reported                               | Not reported                                      | Not reported                                              | Mechanical detachment (complete)                          | Yes                                                             | Complete deployment with full recoverability                                                                                                              |
| Surpass Streamline | 2.0–5.0                          | 12–50                                    | 70                                         | 30                                                | Not reported                                              | Distal catheter with pusher catheter                      | Yes ( $\leq 11$ mm between catheter tip and pusher must remain) | 67%, 61%, and 34% less tracking force than Pipeline, or FRED, respectively; can be repositioned distally or proximally                                    |
| Tubridge           | 2.5–6.5                          | 12–45                                    | 30–35 <sup>e</sup>                         | 65–70                                             | 0.04–0.05 mm <sup>2</sup> <sup>f</sup>                    | Push-pull                                                 | Yes, to marker at midpoint of device                            | More braided microfilaments for large sizes; decreases shortening rate after full opening                                                                 |
| eCLIPs             | Single size for vessels 2.0–3.25 | 7.5 (aneurysm); 10 (overall)             | 23% (3.25-mm vessel), 42% (2.00-mm vessel) | 77% (3.25-mm vessel), 58% (2.00-mm vessel)        | Not reported                                              | Self-orienting                                            | Yes, fully retrievable                                          | Hybrid stent-like assist device with flow-diverter properties that allow trans-device coil placement if required                                          |
| Derivo             | 3.5–6.0                          | 15–50                                    | 35–38                                      | 62–65                                             | 0.042–0.053 mm <sup>2</sup> (4.0/4.5-mm diameter devices) | Mechanical detachment                                     | Yes                                                             | Radiopaque Pt core aids visibility; special surface treatment makes wires extremely smooth and corrosion-resistant                                        |
| Sphere             | 4.5–6.5                          | NA (Sphere)                              | 46 (6.5-mm device)                         | 54 (6.5-mm device)                                | 0.196–0.3508 mm <sup>2</sup> (6.5-mm device)              | Mechanical detachment                                     | Yes                                                             | Dedicated (primarily) bifurcation device                                                                                                                  |

**Note:**—NA indicates not applicable.

<sup>a</sup> In 0.25-mm increments according to length ranges.

<sup>b</sup> Depends on device sizing relative to artery and configuration of deployed device.

<sup>c</sup> For nontapered option.

<sup>d</sup> Working length.

<sup>e</sup> At aneurysmal neck.

<sup>f</sup> Gradient with lowest size in middle of device.

**On-line Table 2: Outcomes from key trials of endoluminal flow-diverting devices**

| Device, Study     | Description                                                                                  | Patients (No.)   | Aneurysms (No.)  | Indication                                                                                                                                                                              | Occlusion Rate (%)                                 | Morbidity <sup>a</sup> (%) | Mortality (%)                                                         | Reference                                    |
|-------------------|----------------------------------------------------------------------------------------------|------------------|------------------|-----------------------------------------------------------------------------------------------------------------------------------------------------------------------------------------|----------------------------------------------------|----------------------------|-----------------------------------------------------------------------|----------------------------------------------|
| PED               |                                                                                              |                  |                  |                                                                                                                                                                                         |                                                    |                            |                                                                       |                                              |
| PITA              | Prospective, multicenter, single-arm European trial                                          | 31 <sup>b</sup>  | 31               | Unruptured, wide-neck (dome/neck ratio <1.5) or failed previous therapy, predominantly ICA                                                                                              | 93.3 (at 180 days)                                 | 6.5%                       | 0 (at 180 days)                                                       | Nelson et al, 2011 <sup>16</sup>             |
| PUFS              | Prospective, multicenter, single-arm US trial                                                | 108 <sup>c</sup> | 108              | Unruptured, large/giant wide-neck ICA aneurysms                                                                                                                                         | 73.6 (78/106 <sup>d</sup> at 180 days)             | 2.8 <sup>e</sup>           | 2.8                                                                   | Beckske et al, 2013 <sup>18</sup>            |
| PUFS (1 yr)       |                                                                                              | 89               | 91               |                                                                                                                                                                                         | 86.8                                               | 0 <sup>f</sup>             | 0 <sup>f</sup>                                                        | Beckske et al, 2013 <sup>18</sup>            |
| PUFS (3 yr)       |                                                                                              | 74               | 76               |                                                                                                                                                                                         | 93.4                                               | 0 <sup>f</sup>             | 0 <sup>f</sup>                                                        | Beckske et al, 2017(b) <sup>17</sup>         |
| PUFS (5 yr)       |                                                                                              | 61               | 63               |                                                                                                                                                                                         | 95.2                                               | 0 <sup>f</sup>             | 0 <sup>f</sup>                                                        | Beckske et al, 2017(a) <sup>17</sup>         |
| ASPIRe            | Prospective, multicenter, observational registry study                                       | 191              | 207              | Unruptured, predominantly large/giant ICA aneurysms                                                                                                                                     | 74.8 <sup>g</sup> (Median follow-up, 7.8 mo)       | 5.2                        | 1.6                                                                   | Kallmes et al, 2015 <sup>21</sup>            |
| IntrePED          | Retrospective, multicenter, international registry study evaluating neurologic complications | 793              | 906 <sup>h</sup> | Predominantly unruptured ICA ( $\geq 10$ mm, n = 311; <10 mm, n = 349); anterior other, $\geq 10$ mm (n = 178) and posterior (n = 59) aneurysms                                         | –                                                  | 7.1                        | 3.8 (1.4% in anterior ICA, <10 mm, 10.9% in posterior aneurysm group) | Kallmes et al, 2015 <sup>21</sup>            |
| Grissenauer et al | Retrospective, multicenter case review, North America and Europe                             | 129              | 131              | Posterior circulation aneurysms                                                                                                                                                         | 78.1 (Median follow-up, 11 mo)                     | 7.8                        | 9.4                                                                   | Grissenauer et al, 2018 <sup>73</sup>        |
| Silk              |                                                                                              |                  |                  |                                                                                                                                                                                         |                                                    |                            |                                                                       |                                              |
| –                 | Prospective, multicenter, cohort study                                                       | 29               | 34               | Unruptured, fusiform or wide-neck intracranial aneurysms in various anatomic locations                                                                                                  | 69.0 <sup>i</sup>                                  | 15.0                       | 4.0                                                                   | Lubicz et al, 2010 <sup>44</sup>             |
| –                 | Prospective, multicenter, global cohort study                                                | 70               | 70               | Unruptured (n = 60) and recently ruptured (n = 10), saccular or fusiform intracranial aneurysms in various anatomic locations                                                           | 49.0 <sup>i</sup> (Median follow-up, 119 days)     | 4.0                        | 8.0                                                                   | Byrne et al, 2010 <sup>45</sup>              |
| –                 | Retrospective, single-center, case review                                                    | 157              | 180              | Predominantly unruptured, saccular aneurysms of ICA                                                                                                                                     | 78.1                                               | 9.6 (6 mo)                 | 3.2 (6 mo)                                                            | Pumar et al, 2017(a) <sup>46</sup>           |
| –                 | Retrospective, multicenter, Canadian registry study                                          | 92               | 103              | Predominantly saccular aneurysms of ICA                                                                                                                                                 | 83.1 <sup>k</sup> (Median follow-up, 12 mo)        | 8.7                        | 4.3                                                                   | Shankar et al, 2016 <sup>47</sup>            |
| –                 | Retrospective, multicenter, French registry chart review                                     | 65               | 77               | Unruptured or recanalized saccular or fusiform aneurysms, predominantly of ICA                                                                                                          | 68.0 <sup>i</sup> (6 mo), 84.3 <sup>l</sup> (1 yr) | 7.8 (6 mo)                 | 3.4 (6 mo)                                                            | Berge et al, 2012 <sup>48</sup>              |
| –                 | Retrospective, single-center, case review                                                    | 76               | 87               | Predominantly saccular, wide-neck (>4 mm) aneurysms of ICA                                                                                                                              | 87.8 <sup>n</sup> (Mean follow-up, 17.5 mo)        | 3.9                        | 6.6                                                                   | Velioglu et al, 2012 <sup>49</sup>           |
| –                 | Retrospective, multicenter, case review                                                      | 104              | 109              | Small (<10 mm; mean, 4.7 mm), unruptured aneurysms, predominantly of ICA                                                                                                                | 88.5 <sup>o</sup>                                  | 2.9                        | 0.9                                                                   | Pumar et al, 2017(b) <sup>46</sup>           |
| FRED              |                                                                                              |                  |                  |                                                                                                                                                                                         |                                                    |                            |                                                                       |                                              |
| –                 | Prospective, single-center, cohort study                                                     | 29               | 34               | Wide-neck (fundus/neck ratio, <2 or neck diameter, >4-mm) fusiform, or giant ( $\geq 25$ -mm maximum diameter) aneurysms predominantly of ICA                                           | 73.0 <sup>p</sup> (6 mo)                           | 3.4                        | 0                                                                     | Möhlenbruch et al, 2015 <sup>59</sup>        |
| –                 | Retrospective, multicenter, case review                                                      | 50               | 52               | Unruptured (n = 44), mainly anterior (75%) intracranial aneurysms                                                                                                                       | 75.0 <sup>q</sup> (12 mo)                          | 4.0                        | 2                                                                     | Dmytriw et al, 2017 <sup>28</sup>            |
| EUFRED            | Retrospective, multicenter, registry study                                                   | 531              | 579              | Predominantly anterior saccular aneurysms                                                                                                                                               | 91.3% (1 yr)                                       | 0.8                        | 1.5                                                                   | Killer-Oberpfalzer et al, 2018 <sup>37</sup> |
| –                 | Retrospective, single-center, case review                                                    | 50               | 52               | Wide-neck, blisterlike, or fusiform/dissecting aneurysms of any size, predominantly at ICA bifurcation (88%)                                                                            | 87.2 <sup>r</sup> (6 mo)                           | 0                          | 0                                                                     | Luecking et al, 2017 <sup>55</sup>           |
| –                 | Retrospective, single-center, case review                                                    | 33               | 37               | Predominantly unruptured, wide- or no-neck saccular aneurysms of ICA                                                                                                                    | 100.0 (7–12 mo)                                    | 0                          | 0                                                                     | Kocer et al, 2014 <sup>60</sup>              |
| –                 | Retrospective, single-center, case review                                                    | 20               | 24               | Unruptured, saccular, predominantly ICA                                                                                                                                                 | 83.0                                               | 0                          | 0                                                                     | Briganti et al, 2017 <sup>11</sup>           |
| p64               |                                                                                              |                  |                  |                                                                                                                                                                                         |                                                    |                            |                                                                       |                                              |
| –                 | Retrospective, single-center, case review                                                    | 121              | 130              | Unruptured (or-beyond acute SAH phase), recurrences after coiling (n = 20) or clipping (n = 3), mostly anterior/ICA (n = 13 posterior); median neck diameter, 3-mm; median fundus, 4 mm | 85.7 <sup>s</sup> (Median follow-up, 496 days)     | 1.7                        | 0.8                                                                   | Fischer et al, 2015 <sup>69</sup>            |

Continued on next page

On-line Table 2: Continued

| Device, Study      | Description                                                           | Patients (No.)  | Aneurysms (No.) | Indication                                                                                                           | Occlusion Rate (%)                                                      | Morbidity <sup>a</sup> (%) | Mortality (%)                    | Reference                          |
|--------------------|-----------------------------------------------------------------------|-----------------|-----------------|----------------------------------------------------------------------------------------------------------------------|-------------------------------------------------------------------------|----------------------------|----------------------------------|------------------------------------|
| —                  | Retrospective, multicenter, case review                               | 40              | 50              | Predominantly unruptured, saccular, small (86%) aneurysms of ICA; mean neck diameter, 5 mm; mean neck/sac ratio, 0.8 | 88.0                                                                    | 2.5                        | 0                                | Briganti et al, 2017 <sup>4</sup>  |
| Surpass Streamline | Retrospective, multicenter, case review                               | 39              | 48              | Unruptured, saccular aneurysms, mainly anterior (77%); median neck diameter, 3.4 mm                                  | 85.0 <sup>b</sup> (12 mo)                                               | 0                          | 0                                | Morais et al, 2017 <sup>6</sup>    |
| —                  | Prospective, single-center, cohort study                              | 37              | 49              | Unruptured, complex aneurysms, predominantly saccular and ICA                                                        | 94.0 <sup>c</sup>                                                       | 3                          | 0                                | De Vries et al, 2013 <sup>62</sup> |
| —                  | Retrospective, multicenter, case review                               | 52              | 52              | Acutely ruptured or unruptured aneurysms of posterior circulation (29% + coiling)                                    | 66.0 <sup>d</sup>                                                       | Not reported               | 14.0 (Median follow-up, 11.3 mo) | Taschner et al, 2017 <sup>63</sup> |
| Tubridge           | Prospective, single-center, cohort study                              | 28              | 28              | Unruptured, large or giant ICA aneurysms                                                                             | 72.0 <sup>e</sup> (Mean follow-up, 9.9 mo)                              | 0 (Follow-up ≤30 mo)       | 0 (Follow-up ≤30 mo)             | Zhou et al, 2014 <sup>64</sup>     |
| PARAT              | Prospective, multicenter trial                                        | 185             | 185             | Predominantly large ICA aneurysms, some of vertebral artery                                                          | 75.34% (Mean follow-up, 6 mo)                                           | 2.4                        | 1.61                             | Liu et al, 2018 <sup>65</sup>      |
| eCLIPS             | Prospective, first in man study and compassionate use Canada/EU cases | 25 <sup>x</sup> | 25 <sup>x</sup> | Bifurcation aneurysms, mostly of basilar artery tip (some previously coiled), most + coiling                         | 81.0 <sup>y</sup> (MRRC class I/II; average follow-up 8 mo)             | Not reported               | 8.0 (Average follow-up 8 mo)     | Chiu et al, 2018 <sup>71</sup>     |
| —                  | Retrospective, multicenter, case review                               | 24              | 34              | Wide-neck, mostly medium-sized and fusiform, predominantly anterior aneurysms                                        | 71.4 <sup>z</sup> (3-mo follow-up), 77.8 <sup>aa</sup> (9-mo follow-up) | Not reported               | 4.3                              | Akgul et al, 2016 <sup>67</sup>    |

**Note:**—ITT indicates intention-to-treat; MRRC, modified Raymond-Roy classification.

<sup>a</sup> Intracranial hemorrhage and/or ischemic stroke.

<sup>b</sup> Forty-seven devices placed (152 per aneurysm); single PED used in 18 aneurysms.

<sup>c</sup> One hundred five/107 treated patients received >1 device (median, 3; range, 1–15) per target aneurysm.

<sup>d</sup> One hundred six aneurysms in 104 patients (4 patients excluded from effectiveness cohort, 2 patients had additional contralateral aneurysms treated).

<sup>e</sup> Of 107 patients in safety cohort.

<sup>f</sup> No hemorrhagic or ischemic stroke or death reported from 6 mo to 3 yr postprocedure.

<sup>g</sup> Of 103 patients.

<sup>h</sup> Aneurysm size not reported for 10 aneurysms.

<sup>i</sup> Of 24 patients (29 aneurysms), 12 at 3 mo and 12 at 6 mo.

<sup>j</sup> Of 49 aneurysms evaluated at follow-up.

<sup>k</sup> Of 77 patients.

<sup>l</sup> Of 56 aneurysms.

<sup>m</sup> Of 70 aneurysms.

<sup>n</sup> Of 82 aneurysms.

<sup>o</sup> Of 78 aneurysms.

<sup>p</sup> Of 30 aneurysms.

<sup>q</sup> Of 36 aneurysms.

<sup>r</sup> FRED-only 81.5%, 95.0% FRED + coiling.

<sup>s</sup> Of 35 aneurysms.

<sup>t</sup> Of 41 aneurysms.

<sup>u</sup> Of 41 aneurysms.

<sup>v</sup> Of 44 patients.

<sup>w</sup> Of 25 aneurysms.

<sup>x</sup> Twenty-five patients had successful device placement.

<sup>y</sup> Of 21 patients with complete data.

<sup>z</sup> N = 28 aneurysms in 20 patients.

<sup>aa</sup> N = 18 aneurysms in 9 patients.
